# Supplementary material for: DNA polymerase η modulates replication fork progression and DNA damage responses in platinum-treated human cells
Source: PubMed Central journal article supplement — Sci Rep. 2013 Nov 20;3:3277. doi: 10.1038/srep03277 (PMC6505966; doi:10.1038/srep03277), 2013-11-20
Supplement: srep03277-s1.pdf [file srep03277-s1.pdf]

**DNA polymerase  $\eta$  modulates replication fork progression and DNA damage responses in platinum-treated human cells.**

Anna M. Sokol<sup>1\*\*</sup>, Séverine Cruet-Hennequart<sup>1\*\*\*</sup>, Philippe Pasero<sup>2</sup> and Michael P. Carty<sup>1\*</sup>

<sup>1</sup> DNA Damage Response Laboratory, Centre for Chromosome Biology, Biochemistry, School of Natural Sciences, National University of Ireland, Galway, Ireland

<sup>2</sup> Department of Molecular Basis of Human Diseases, Institute of Human Genetics, CNRS UPR 1142, Montpellier, France

\* To whom correspondence should be addressed. Tel: (353) 91-493695; Fax: (353) 91-495504; Email: michael.carty@nuigalway.ie

\*\* Present Address: Laboratory of Mitochondrial Biogenesis, International Institute of Molecular and Cell Biology, 4 Ks. Trojdena Street, 02-109 Warsaw, Poland

\*\*\* Present Address: Microenvironment and Pathology Laboratory (MILPAT, EA 4652), Niveau 3, Faculté de Médecine, Avenue de la Côte de Nacre, 14032 Caen cedex. France

**Supplementary Figure 1. DNA combing parameters.** **1a** Mean length and synthesis rate values from two independent DNA combing experiments  $\pm$  SEM, are presented in Table format. N stands for the number of measured objects. **1b** Graph presents the frequency of origin firing based on data from DNA combing experiments carried out under the indicated conditions. BrdU incorporation data from FACS analysis was used to calculate the S-phase DNA fraction.

**Supplementary Figure 2. Kinetics of carboplatin- and cisplatin-induced DNA damage responses in cells lacking and expressing DNA polymerase  $\eta$ .** Pol $\eta$ -deficient XP30RO cells and pol $\eta$  expressing TR30-2 cells were treated with indicated doses of carboplatin and cisplatin and harvested at indicated times post-treatment. Expression of DNA damage response proteins and protein phosphorylation were analysed by western blotting using specific antibodies as described in Materials and Methods. For direct comparison, samples obtained from both cell lines at the same time-point were run on the same gels.

**Supplementary Table 1. EdU intensity analysis by quantitative immunofluorescence.** Cells expressing (TR30-2) or lacking (XP30RO) pol $\eta$  were grown on glass coverslips and treated with indicated doses of cisplatin and carboplatin. 75 minutes before fixing, cells were incubated with 10 $\mu$ M EdU. Click chemistry was used to visualise EdU incorporation. **1a** Mean relative EdU intensities values  $\pm$  SEM from three independent experiments under the indicated conditions are presented. The number of individual values is indicated as n. **1b** Fold-decrease in EdU intensity  $\pm$  SEM relative to mock-treated samples is presented. **1c** The EdU intensity threshold, obtained by subtracting double the SEM value from the mean relative EdU intensity value.

| a      | Mock - treated   |                              |     | Carboplatin 50 $\mu$ M |                              |     | Cisplatin 1.7 $\mu$ M |                              |     |
|--------|------------------|------------------------------|-----|------------------------|------------------------------|-----|-----------------------|------------------------------|-----|
|        | Mean length [kb] | Mean synthesis rate [kb/min] | n   | Mean length [kb]       | Mean synthesis rate [kb/min] | n   | Mean length [kb]      | Mean synthesis rate [kb/min] | n   |
| TR30-2 | 82.0 $\pm$ 2.8   | 1.37 $\pm$ 0.05              | 183 | 82.8 $\pm$ 2.8         | 1.38 $\pm$ 0.05              | 185 | 78.9 $\pm$ 2.8        | 1.31 $\pm$ 0.05              | 163 |
| XP30RO | 82.3 $\pm$ 2.1   | 1.37 $\pm$ 0.03              | 268 | 69.1 $\pm$ 2.6         | 1.15 $\pm$ 0.04              | 180 | 48.2 $\pm$ 1.6        | 0.80 $\pm$ 0.03              | 360 |

b

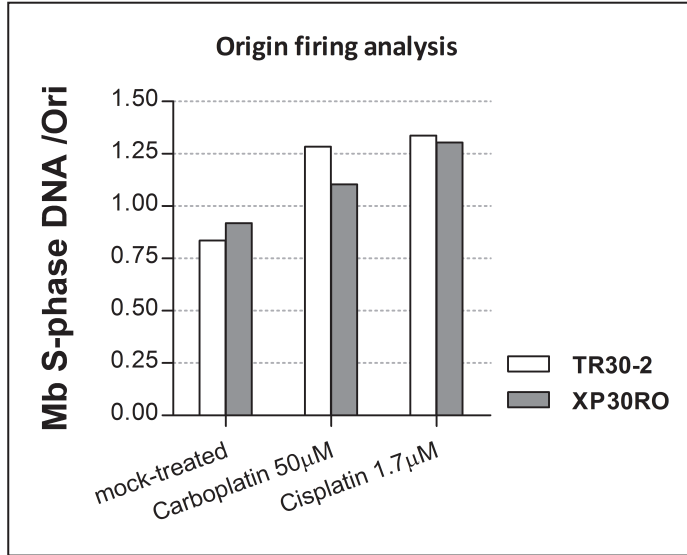

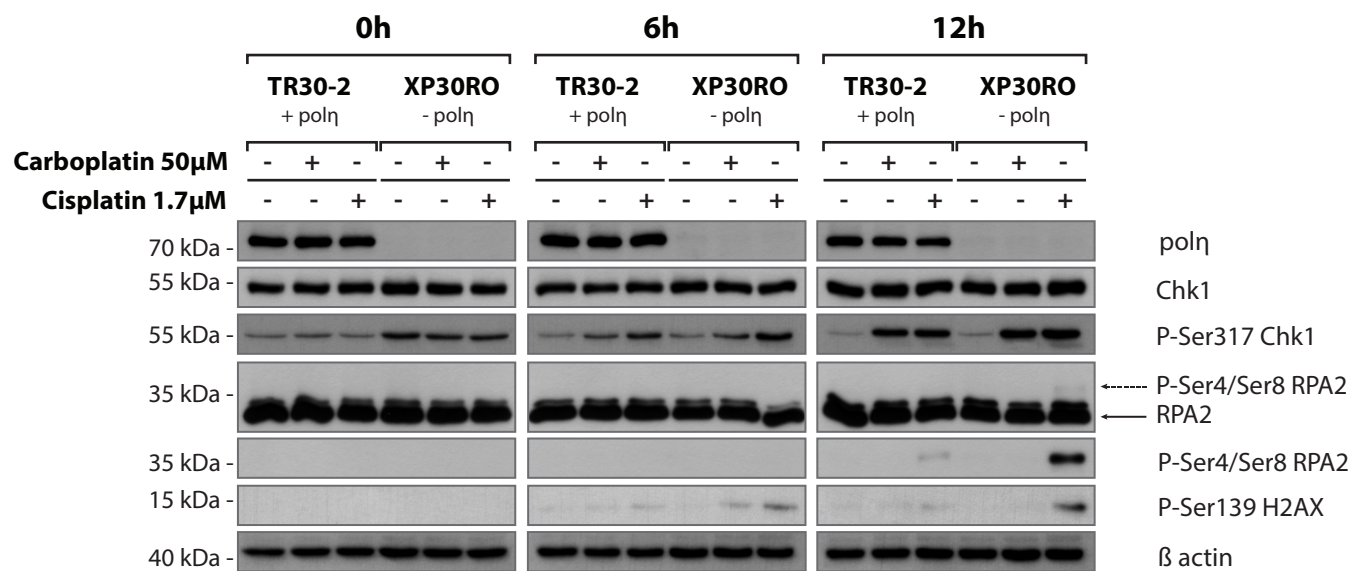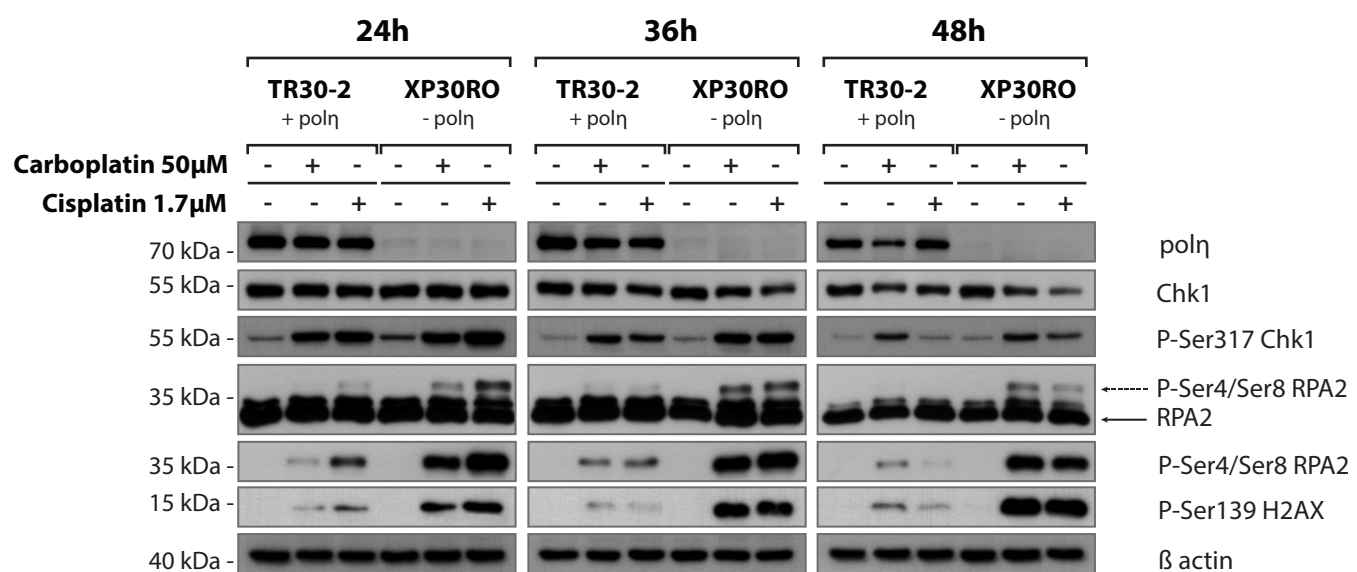

| <b>a</b>      | <b>Mock - treated</b>       |     | <b>Carboplatin 50µM</b>     |     | <b>Cisplatin 1.7µM</b>      |     |
|---------------|-----------------------------|-----|-----------------------------|-----|-----------------------------|-----|
|               | Mean relative EdU intensity | n   | Mean relative EdU intensity | n   | Mean relative EdU intensity | n   |
| <b>TR30-2</b> | 1175.0 ± 31.5               | 394 | 447.9 ± 12.4                | 487 | 385.7 ± 14.1                | 402 |
| <b>XP30RO</b> | 1220.0 ± 26.7               | 362 | 255.1 ± 9.4                 | 523 | 177.0 ± 9.5                 | 489 |

| <b>b</b>      | <b>Carboplatin 50µM</b>                 | <b>Cisplatin 1.7µM</b>                  |
|---------------|-----------------------------------------|-----------------------------------------|
|               | Fold decrease in relative EdU intensity | Fold decrease in relative EdU intensity |
| <b>TR30-2</b> | 2.7 ± 0.14                              | 3.2 ± 0.22                              |
| <b>XP30RO</b> | 5.7 ± 1.75                              | 7.3 ± 1.19                              |

| <b>c</b>      | <b>Carboplatin 50µM</b>                                                     | <b>Cisplatin 1.7µM</b>                                                      |
|---------------|-----------------------------------------------------------------------------|-----------------------------------------------------------------------------|
|               | Threshold value for EdU intensity<br>Mean relative EdU intensity<br>- 2xSEM | Threshold value for EdU intensity<br>Mean relative EdU intensity<br>- 2xSEM |
| <b>XP30RO</b> | 236.7                                                                       | 157.9                                                                       |
